# Supplementary material for: Spherical V-doped nickel–iron LDH decorated on Ni3S2 as a high-efficiency electrocatalyst for the oxygen evolution reaction
Source: Royal Society of Chemistry journal article supplement (doi:10.1039/d1dt04224f), 2022-01-01
Supplement: d1dt04224f1.pdf [file d1dt04224f1.pdf]

## Supporting Information

### Spherical V-doped Nickel-iron LDH Decorated on Ni<sub>3</sub>S<sub>2</sub> as High-efficiency Electrocatalyst for Oxygen Evolution Reaction

Jie Bai <sup>a</sup>, Tianning Zhou <sup>a</sup>, Yihao Gao <sup>a</sup>, Meilin Zhang <sup>a</sup>, Xiaofei Jing <sup>b,\*</sup>, Yaqiong  
Gong <sup>a,b,\*</sup>

<sup>a</sup> School of Chemical Engineering and Technology, North University of China,  
Taiyuan, 030051, P. R. China

<sup>b</sup> Northeast Normal University, Key Lab Polyoxometalate Sci, Minist Educ,  
Changchun, 130024, P. R. China

\* Email: [jingxf100@nenu.edu.cn](mailto:jingxf100@nenu.edu.cn) (Xiaofei Jing); [gyq@nuc.edu.cn](mailto:gyq@nuc.edu.cn) (Yaqiong Gong)

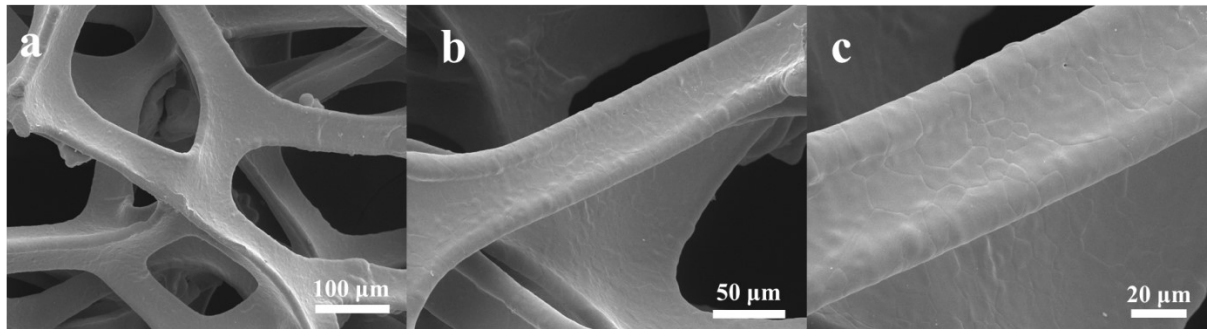

**Fig. S1.** SEM images of commercial Ni foam at low and high magnifications.

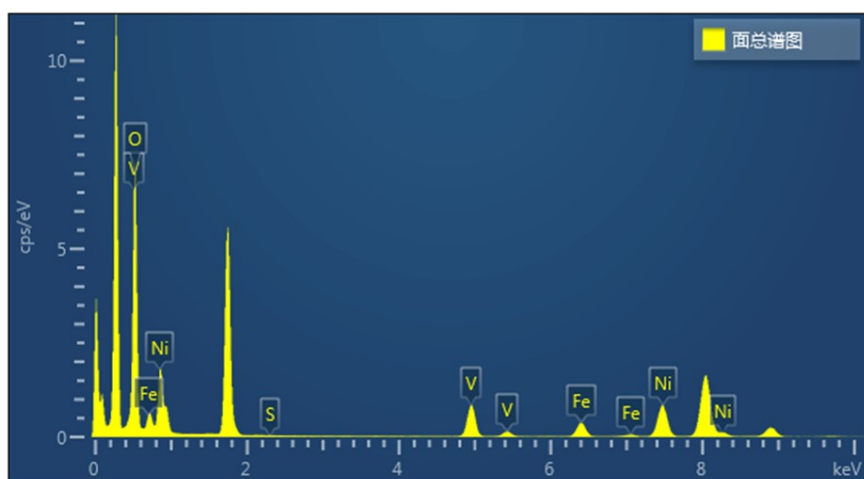

**Fig. S2.** Element composition diagram corresponding to EDX spectrum

**Table S1** Elemental composition of V, Fe, Ni and S determined by EDX spectrum

| Element | V    | Fe   | Ni   | S    | O     |
|---------|------|------|------|------|-------|
| Atom%   | 5.85 | 2.75 | 6.35 | 0.02 | 85.03 |

**Table S2** XPS quantization ratio of three valence states V

| Name     | V <sup>3+</sup> | V <sup>4+</sup> | V <sup>5+</sup> |
|----------|-----------------|-----------------|-----------------|
| %content | 26.93           | 49.96           | 23.11           |

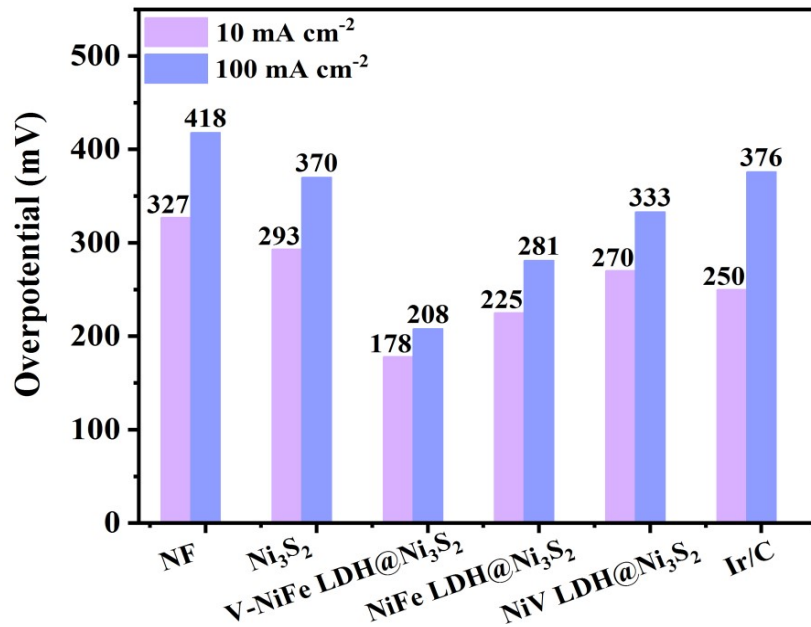

Fig. S3. comparison of overpotential required at 10 mA cm<sup>-2</sup> and 100 mA cm<sup>-2</sup>

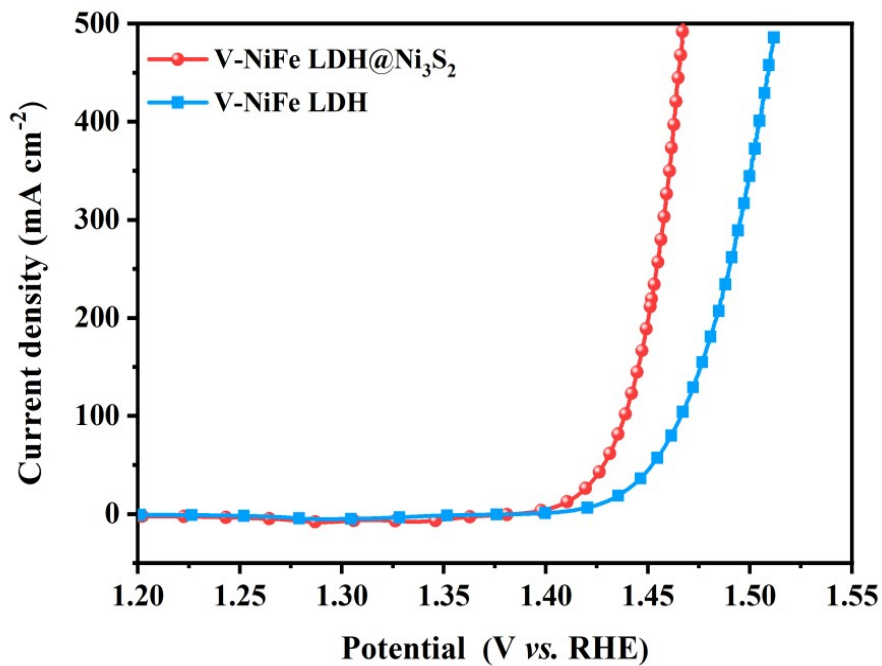

Fig. S4. OER polarization curves of V-NiFe LDH@Ni<sub>3</sub>S<sub>2</sub> and V-NiFe LDH.

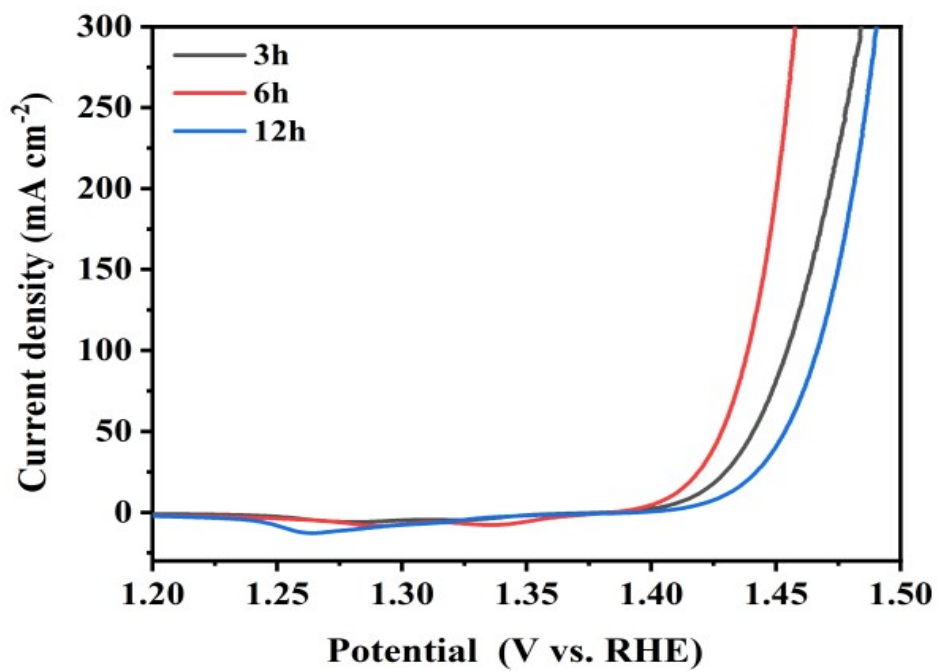

**Fig. S5.** OER polarization curves of V-NiFe LDH@Ni<sub>3</sub>S<sub>2</sub>-3h, V-NiFe LDH@Ni<sub>3</sub>S<sub>2</sub>-6h, and V-NiFe LDH@Ni<sub>3</sub>S<sub>2</sub>-12h.

**Table S3.** Comparison of the OER performance for the V-NiFe LDH@Ni<sub>3</sub>S<sub>2</sub> catalyst

| Electrocatalysts                                                         | Overpotential (mV)<br>at 10 mA cm <sup>-2</sup> | Tafel slope<br>(mV dec <sup>-1</sup> ) | Electrolyte | Reference                                         |
|--------------------------------------------------------------------------|-------------------------------------------------|----------------------------------------|-------------|---------------------------------------------------|
| V-NiFe-LDH@Ni <sub>3</sub> S <sub>2</sub>                                | 178                                             | 27.31                                  | 1M KOH      | This work                                         |
| NiFe LDH/NF                                                              | 219                                             | 33                                     | 1M KOH      | J. Mater. Chem. A, 2019, 7, 22889.                |
| Pt-NiFe LDH                                                              | 195                                             | 31.3                                   | 1M KOH      | Nano Energy 2017, 39, 30-43.                      |
| Ni <sub>5</sub> P <sub>4</sub> /Ni <sub>5</sub> P <sub>2</sub> /NiFe LDH | 197                                             | 46.6                                   | 1M KOH      | J. Mater. Chem. A. 2018, 6, 13619-13623.          |
| Cu@NiFe LDH                                                              | 199                                             | 27.8                                   | 1M KOH      | Energy Environ. Sci. 2017, 10, 1820-1827.         |
| NiFe LDH/(NiFe)S <sub>x</sub>                                            | 210                                             | 105                                    | 1M KOH      | Electrochim. Acta, 2020, 348, 136339.             |
| NiFe-LDH@NiCoP/NF                                                        | 220                                             | 48.6                                   | 1M KOH      | Adv. Funct. Mater. 2018, 28, 1706847.             |
| NiFeRu LDH/NF                                                            | 225                                             | 32.4                                   | 1M KOH      | Adv. Mater. 2018, 30, 1706279.                    |
| Cu@CoFe LDH                                                              | 240                                             | 44.4                                   | 1M KOH      | Nano Energy 2017, 41, 327-336.                    |
| CoSe/NiFe LDH                                                            | 250                                             | 57                                     | 1M KOH      | Energy Environ. Sci. 2016, 9,478-483.             |
| NiO@NiFe-LDH                                                             | 256                                             | 72                                     | 1M KOH      | ACS Sustainable Chem. Eng. 2019, 7, 2327.         |
| NiCo/NiCoOx @FeOOH                                                       | 278                                             | 47.5                                   | 1M KOH      | Electrochim. Acta 2017, 257, 1-8.                 |
| Ni <sub>2</sub> P/Ni <sub>3</sub> S <sub>2</sub> /NF                     | 210                                             | 62                                     | 1M KOH      | Nano Energy 2018, 51, 26-36.                      |
| MoxW <sub>1-x</sub> S <sub>2</sub> @Ni <sub>3</sub> S <sub>2</sub> /NF   | 285                                             | 90                                     | 1M KOH      | ACS Appl. Mater. Interfaces 2017, 9, 26066-26076. |

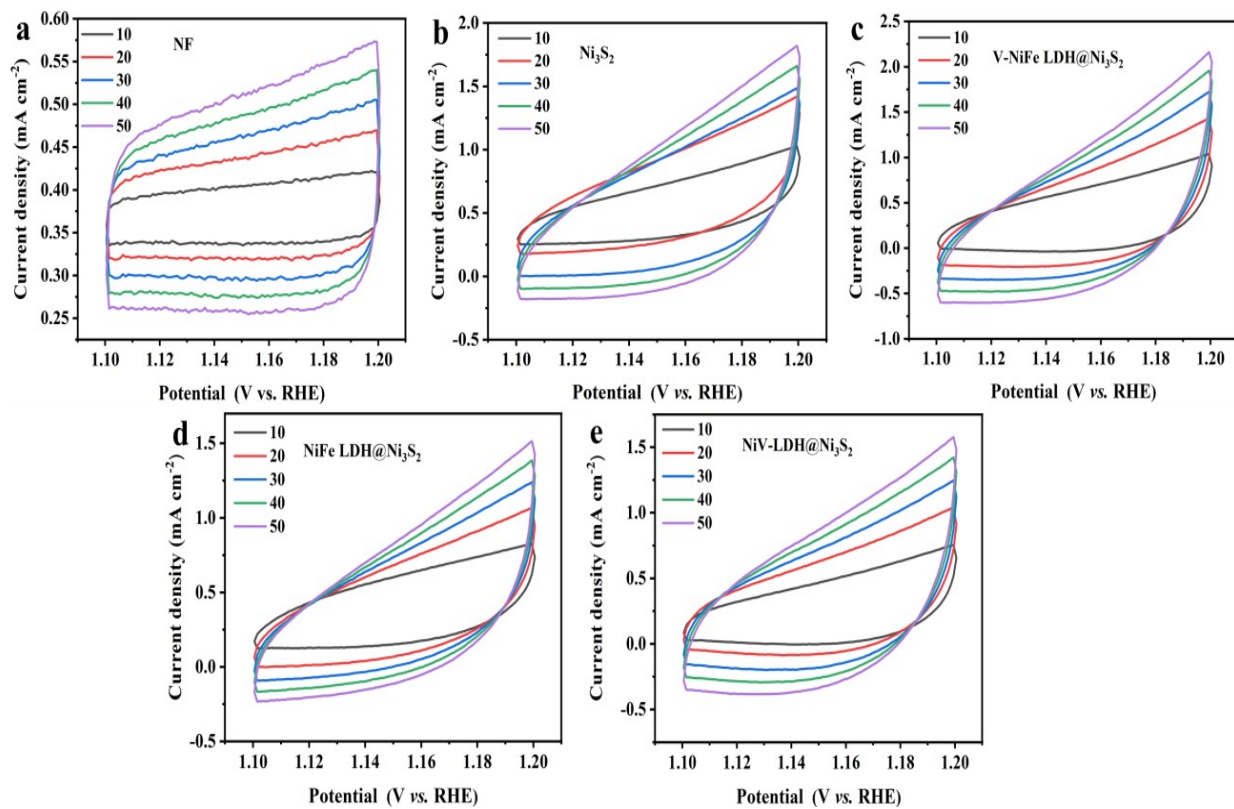

**Fig. S6.** Cyclic voltammograms at different scan rates (from 10 mV/s to 50 mV/s with an interval rate of 10 mV/s). (a) NF, (a) Ni<sub>3</sub>S<sub>2</sub> (b) V-NiFe LDH@Ni<sub>3</sub>S<sub>2</sub>, and (c) NiFe-LDH@Ni<sub>3</sub>S<sub>2</sub>, and (d) NiV-LDH@Ni<sub>3</sub>S<sub>2</sub>.

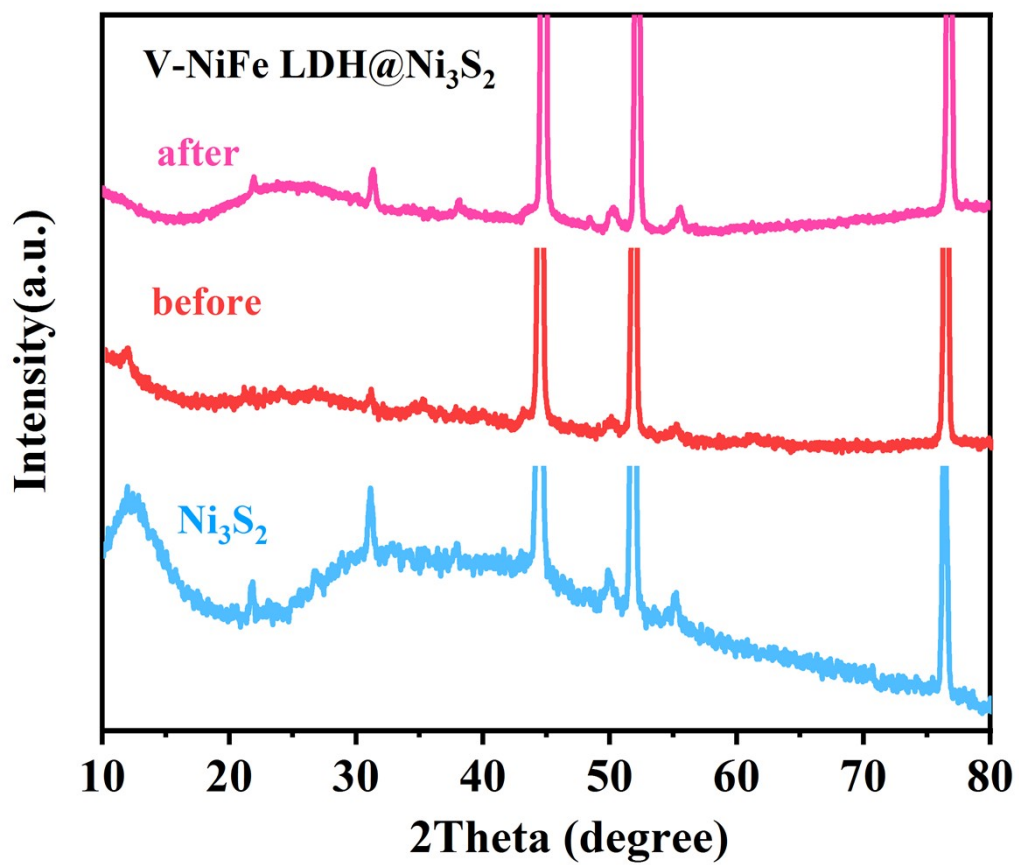

Fig. S7. XRD patterns



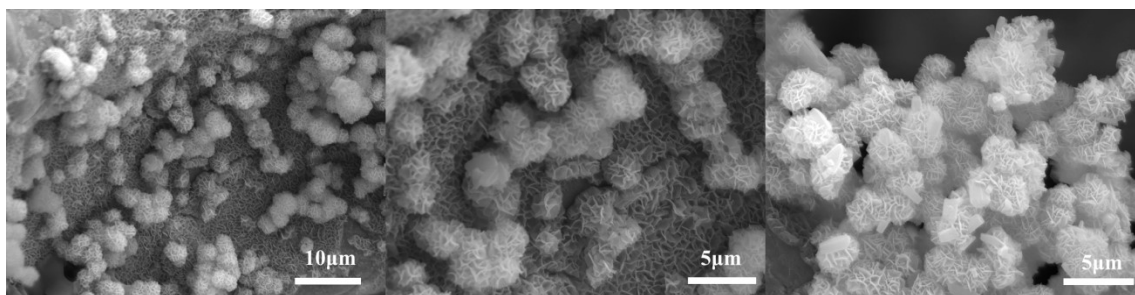

**Fig. S8.** SEM images of V-NiFe LDH@Ni<sub>3</sub>S<sub>2</sub> (anode for OER) after 20 hours OER stability measurements with other reported OER electrocatalysts.
